# Supplementary material
Source: PubMed Central journal article supplement (PMC6811775)
Supplement: BPH-176-3983-s001.pdf [file BPH-176-3983-s001.pdf]

## **Supporting Information**

### **Myricanol modulates skeletal muscle-adipose crosstalk to alleviate high fat diet-induced obesity and insulin resistance**

**Running title:** Myricanol directs myotubes-adipocytes communication

Shengnan Shen<sup>1</sup>, Qiwen Liao<sup>1</sup>, Tian Zhang<sup>1</sup>, Ruile Pan<sup>2</sup>, Ligen Lin<sup>1,\*</sup>

<sup>1</sup> State Key Laboratory of Quality Research in Chinese Medicine, Institute of Chinese Medical Sciences, University of Macau, Avenida da Universidade, Taipa, Macau 999078, China

<sup>2</sup> Institute of Medicinal Plant Development, Peking Union Medical College, Chinese Academy of Medical Science, Beijing 100193, China

#### **\*Correspondance**

Dr. Ligen Lin Institute of Chinese Medical Sciences, University of Macau, Avenida da Universidade, Taipa, Macao, China. Phone: +853 88228041, Fax : +853 28841358; email: ligenl@um.edu.mo.

**Table S1. Antibodies for immunoblotting.**

| Antibody                 | Source | Vendor                    | Catalog No. |                  |
|--------------------------|--------|---------------------------|-------------|------------------|
| p-ACC (Ser79)            | Rabbit | Cell Signaling Technology | #3661       | RRID:AB_330337   |
| ACC                      | Rabbit | Cell Signaling Technology | #3662       | RRID:AB_2219400  |
| p-AMPK $\alpha$ (Thr172) | Rabbit | Santa Cruz Biotechnology  | sc-33524    | RRID:AB_2169714  |
| AMPK $\alpha$ 1/2        | Rabbit | Santa Cruz Biotechnology  | sc-25792    | RRID:AB_2169546  |
| CD36                     | Rabbit | Santa Cruz Biotechnology  | sc-9154     | RRID:AB_2072518  |
| COX2                     | Goat   | Santa Cruz Biotechnology  | sc-23983    | RRID:AB_2066365  |
| PGC-1 $\alpha$           | Rabbit | Cell Signaling Technology | #2178       | RRID:AB_823600   |
| UCP3                     | Goat   | Santa Cruz Biotechnology  | sc-31387    | RRID:AB_2213920  |
| FNDC5                    | Rabbit | Proteintech               | 23995-1-AP  |                  |
| GAPDH                    | Rabbit | Santa Cruz Biotechnology  | sc-25778    | RRID:AB_10167668 |
| p-IRS1 (Tyr632)          | Rabbit | Santa Cruz Biotechnology  | sc-17196    | RRID:AB_669445   |
| IRS1                     | Rabbit | Cell Signaling Technology | #2382       | RRID:AB_330333   |
| p-AKT1/2/3 (Ser473)      | Rabbit | Santa Cruz Biotechnolog   | sc-7985     | RRID:AB_667741   |
| AKT1/2/3                 | Rabbit | Santa Cruz Biotechnolog   | sc-8312     | RRID:AB_671714   |
| p-GSK3 $\beta$ (Ser9)    | Rabbit | Cell Signaling Technology | #9323       | RRID:AB_2115201  |
| GSK3 $\beta$             | Rabbit | Cell Signaling Technology | #12456      | RRID:AB_2636978  |
| UCP1                     | Goat   | Santa Cruz Biotechnology  | sc-6529     | RRID:AB_2213781  |

---

|                 |        |                           |            |                 |
|-----------------|--------|---------------------------|------------|-----------------|
| UCP1            | Rabbit | Proteintech               | 23673-1-AP |                 |
| PPAR $\gamma$   | Rabbit | Santa Cruz Biotechnology  | sc-7196    | RRID:AB_654710  |
| SIRT1           | Rabbit | Proteintech               | 13161-1-AP |                 |
| $\beta$ -actin  | Rabbit | Santa Cruz Biotechnology  | sc-1616    | RRID:AB_630836  |
| Anti-rabbit IgG |        | Cell Signaling Technology | #7074      | RRID:AB_2099233 |
| Anti-goat IgG   |        | Santa Cruz Biotechnology  | sc-2354    | RRID:AB_628490  |

---

**Table S2. List of oligonucleotide primer pairs used in qRT-PCR.**

| Gene         | GenBank number | Forward                      | Reverse                     |
|--------------|----------------|------------------------------|-----------------------------|
| <i>18S</i>   | NR003278       | AGCCTGCGGCTTAATTT<br>GAC     | CAACTAAGAACGGCC<br>ATGCA    |
| <i>Ucp1</i>  | AK002759       | ACTGCCACACCTCCAGT<br>CATT    | CTTTGCCTCACTCAG<br>GATTGG   |
| <i>Cox7a</i> | NM009944       | CTCTGGTCCGGTCTTTT<br>AGC     | GTACTGGGAGGTCAT<br>TGTCGG   |
| <i>Cidea</i> | NM007702       | TGCTCTTCTGTATCGCC<br>CAGT    | GCCGTGTTAAGGAAT<br>CTGCTG   |
| <i>Ppara</i> | NM011144       | CTGAGACCCTCGGGGA<br>AC       | AAACGTCAGTTCACA<br>GGGAAG   |
| <i>Cd36</i>  | NM001159558    | AAATTGTACCTGGGAGT<br>TGGCGAG | ACAGTTCCGATCACA<br>GCCCATCT |

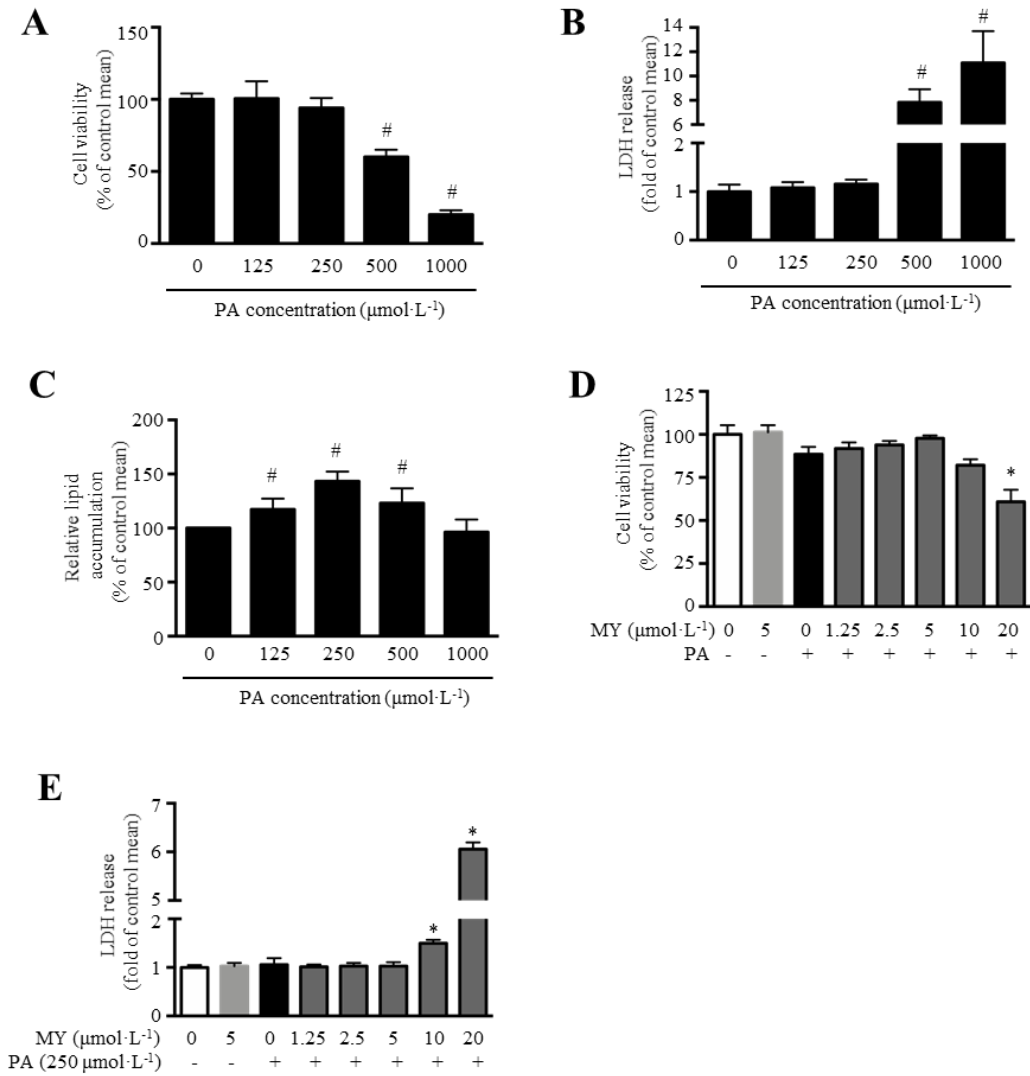

**Figure S1.** Cytotoxicity of PA and MY in C2C12 myotubes. Cytotoxicity of different concentrations of PA in C2C12 myotubes, assessed by MTT assay (A) and LDH release assay (B) ( $n = 9$ ). (C) Lipid accumulation in C2C12 myotubes treated with different concentrations of PA, assessed by Nile red staining ( $n = 9$ ). Cytotoxicity of MY in PA-treated C2C12 myotubes, assessed by MTT assay (D) and LDH release assay (E) ( $n = 9$ ). Data are shown as mean  $\pm$  S.D. <sup>#</sup> $p < 0.05$ , vehicle vs. PA. <sup>\*</sup> $p < 0.05$ , MY vs. PA.

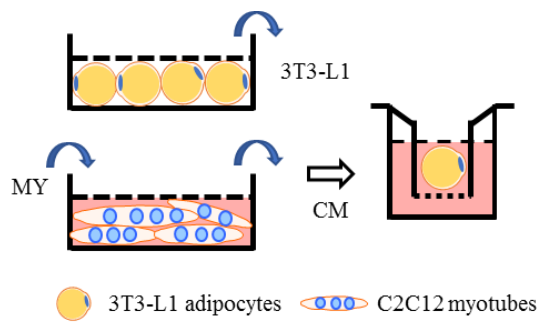

**Figure S2.** The experimental procedure of C2C12 myotubes and 3T3-L1 adipocytes co-culture.

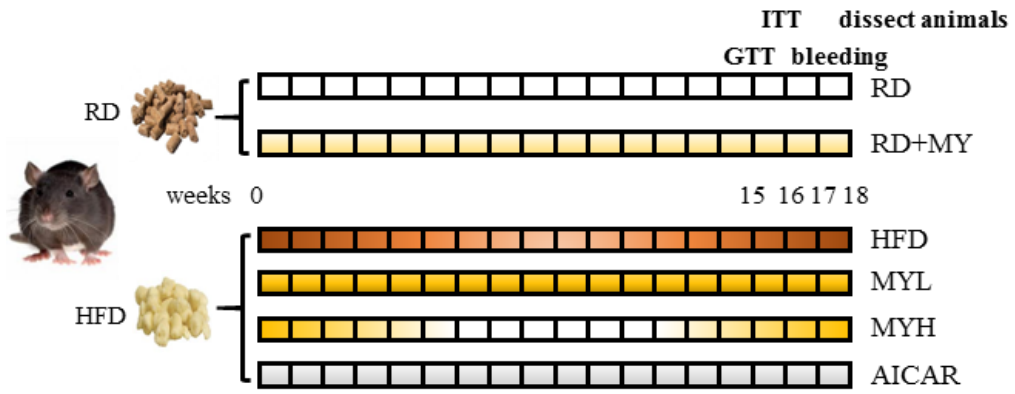

**Figure S3.** The experimental procedure of HFD-fed mice model.

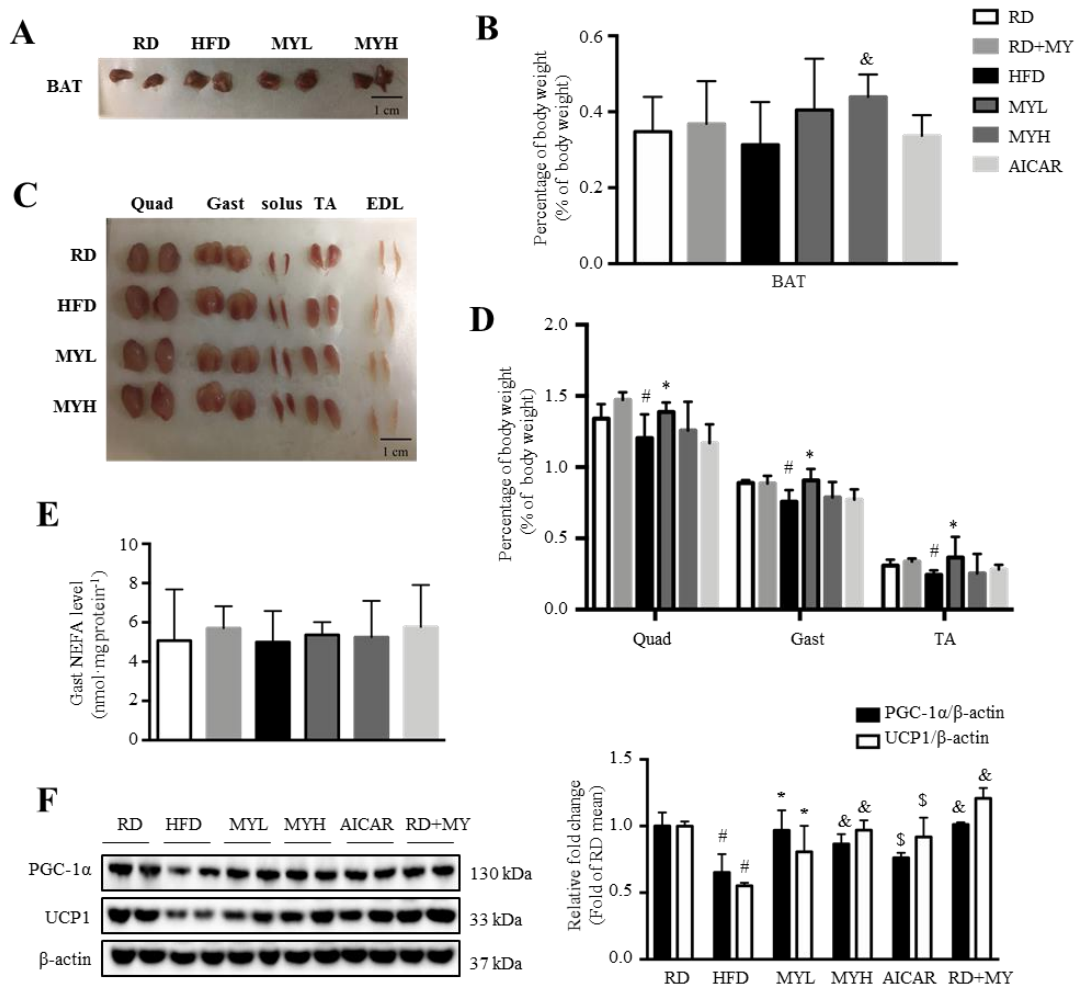

**Figure S4.** (A) Photographs of representative BAT. (B) The ratio of BAT to body weight ( $n = 6$ ). (C) Photographs of representative skeletal muscle, including quadriceps, gastrocnemius, soleus, TA and EDL. (D) Tissue index of quadriceps, gastrocnemius, and TA muscles ( $n = 6$ ). (E) NEFA level in Gast muscle ( $n = 6$ ). (F) The expression levels of PGC-1 $\alpha$  and UCP1 in BAT were determined by western blots.  $\beta$ -actin was used as a loading control. ( $n = 6$ ). Data are shown as mean  $\pm$  S.D. \* $p < 0.05$ , MYL vs. HFD. & $p < 0.05$ , MYH vs. HFD or RD+MY vs. RD. # $p < 0.05$ , RD vs. HFD. \$ $p < 0.05$ , AICAR vs. HFD.
